# Supplementary material
Source: PubMed Central journal article supplement (PMC6033653)
Supplement: NIHMS933341-supplement-Supp_info.pdf [file NIHMS933341-supplement-Supp_info.pdf]

**Supplementary Table 1: Response to Therapy per ICA criteria<sup>1</sup>**

| <b>Type of Response</b> | <b>Criteria</b>                                                        |
|-------------------------|------------------------------------------------------------------------|
| No response             | No regression of AKI                                                   |
| Partial response        | Regression of AKI stage with Scr $\geq$ 0.3 mg/dL above baseline value |
| Full response           | Return of Scr to value within 0.3 mg/dL of baseline line value         |

ICA: International Club of Ascites; AKI: acute kidney injury; Scr: serum creatinine

**Supplementary Table 2: Criteria for HRS, PRA, and ATN**

| Type of AKI        | Criteria                                                                                                                                                                                                                                                                                                                                                                                                                                                                                                                                                                                                                                                                                                                                                                                                                                                    |
|--------------------|-------------------------------------------------------------------------------------------------------------------------------------------------------------------------------------------------------------------------------------------------------------------------------------------------------------------------------------------------------------------------------------------------------------------------------------------------------------------------------------------------------------------------------------------------------------------------------------------------------------------------------------------------------------------------------------------------------------------------------------------------------------------------------------------------------------------------------------------------------------|
| HRS-1 <sup>2</sup> | <ul style="list-style-type: none"> <li>• Cirrhosis with ascites</li> <li>• Serum Creatinine concentration &gt;1.5mg mg/dL</li> <li>• Doubling of serum creatinine to a final value of <math>\geq 2.5</math> mg/dL in less than two weeks</li> <li>• No improvement of serum creatinine concentration (decrease to <math>\leq 1.5</math> mg/dL) after at least 2 days of diuretic withdrawal and volume expansion with albumin at a dosage of 1g/kg of body weight/day up to a maximum dosage of 100g/day</li> <li>• Absence of shock</li> <li>• No current or recent treatment with nephrotoxic drugs</li> <li>• Absence of parenchymal kidney disease as indicated by proteinuria with a protein concentration of &gt; 500 mg/day, microhematuria with &gt;50 red blood cells per high-powerfield, and/or abnormal renal findings on ultrasound</li> </ul> |
| PRA <sup>3</sup>   | <ul style="list-style-type: none"> <li>• History of events leading to decreased intravascular volume (i.e. large volume paracentesis, overuse of diuretics, vomiting, diarrhea, bleeding, or sepsis)</li> <li>• Physical examination findings to suggest hypovolemia (i.e. dry mucus membranes)</li> <li>• Response to fluid repletion in patients who have evidence of volume depletion</li> </ul>                                                                                                                                                                                                                                                                                                                                                                                                                                                         |
| ATN <sup>3</sup>   | <ul style="list-style-type: none"> <li>• History of hypotensive events</li> <li>• Presence of shock</li> <li>• Urinalysis revealing muddy brown granular, epithelial cell casts, and free renal tubular epithelial cells</li> <li>• Normal blood urea nitrogen to creatinine ratio</li> </ul>                                                                                                                                                                                                                                                                                                                                                                                                                                                                                                                                                               |

HRS: hepatorenal syndrome; PRA: pre-renal azotemia; ATN: acute tubular necrosis

**Supplementary Table 3: Comparison Between Derivation Cohort and Validation Cohort**

| <b><i>Characteristic Variable</i></b> | <b>p-value</b> |
|---------------------------------------|----------------|
| Age                                   | 0.414          |
| Gender                                | 0.675          |
| Etiology of Cirrhosis                 | 0.731          |
| Body Mass Index                       | 0.833          |
| MELD-Na                               | 0.275          |
| CTP                                   | 0.912          |
| NSAIDS                                | 0.061          |
| NSBB                                  | 0.999          |
| Diabetes                              | 0.833          |
| Hypertension                          | 0.803          |
| Baseline Scr                          | 0.600          |
| Baseline BUN                          | 0.062          |
| Admission Scr                         | 0.404          |
| Admission BUN                         | 0.717          |
| Mean Arterial Pressure                | 0.699          |
| Serum Na                              | 0.634          |
| Urine Na                              | 0.772          |
| Urine Urea                            | 0.398          |
| Urine Scr                             | 0.159          |
| SIRS                                  | 0.999          |
| FEUrea                                | 0.354          |
| Response to therapy                   | 0.665          |

MELD-Na: Model for Endstage Liver Disease Sodium; CTP: Child-Turcotte-Pugh; NSAIDS: non-steroidal anti-inflammatory drugs; NSBB: non-selective beta blocker; Scr: serum creatinine; BUN: blood urea nitrogen; eGFR: estimate glomerular filtration rate

**Supplementary Table 4: Diagnostic Performance of FEUrea at a Fixed Specificity and Sensitivity of 90%**

|                | Specificity at 90%             |                 |         |         | Sensitivity at 90%             |                 |         |         |
|----------------|--------------------------------|-----------------|---------|---------|--------------------------------|-----------------|---------|---------|
|                | Cut-off                        | Sensitivity (%) | NPV (%) | PPV (%) | Cut-off                        | Specificity (%) | NPV (%) | PPV (%) |
| ATN vs non-ATN | ≥36.20: ATN<br><36.20: non-ATN | 91              | 97      | 71      | ≥37.70: ATN<br><37.70: non-ATN | 92              | 97      | 77      |
| HRS vs non-HRS | <32.86: HRS<br>≥32.86: non-HRS | 53              | 52      | 89      | <21.40: HRS<br>≥21.40: non-HRS | 61              | 79      | 81      |
| PRS vs HRS     | <32.86: HRS<br>≥32.86: PRA     | 29              | 52      | 75      | <21.35: HRS<br>≥21.35: PRA     | 61              | 85      | 73      |

ATN: acute tubular necrosis; HRS: hepatorenal syndrome type 1; PRA: pre-renal azotemia; PPV: positive predictive value; NPV: negative predictive value

## **REFERENCES**

---

- <sup>1</sup> Angeli P, Gines P, Wong F, Bernardi M, Boyer TD, Gerbes A, Moreau R, et al. Diagnosis and management of acute kidney injury in patients with cirrhosis: Revised consensus recommendations of the international club of ascites. *J Hepatol* 2015; **62**(4): 968-974.
- <sup>2</sup> Wong F, Nadim MK, Kellum JA, Salerno F, Bellomo R, Gerbes A, Angeli P, et al. Working party proposal for a revised classification system of renal dysfunction in patients with cirrhosis. *Gut* 2011; **60**(5): 702-709.
- <sup>3</sup> KDIGO AKI Work Group. KDIGO clinical practice guideline for acute kidney injury. *Kidney Int Suppl.* 2012;17:1–138.
